1 **Honeybee dance-followers respond similarly to dances regardless of their spatial information**

2 **content**

3 Matthew J. Hasenjager<sup>1</sup>, William Hoppitt<sup>1</sup>, Ellouise Leadbeater<sup>1</sup>

4

5 <sup>1</sup>*Department of Biological Sciences, Royal Holloway, University of London, Egham, United*

6 *Kingdom*

7

8 *Correspondence:* M. J. Hasenjager, Department of Biology, Royal Holloway, University of

9 London, Egham, TW20 0EX, United Kingdom. Email address: [hasenjag27@gmail.com](mailto:hasenjag27@gmail.com)

10

11 **Abstract**

12 Honeybees famously use waggle dances to communicate foraging locations to nestmates in the

13 hive, thereby recruiting them to those sites. The decision to dance is governed by rules that,

14 when operating collectively, are assumed to direct foragers to the most profitable locations

15 with little input from potential recruits, who are presumed to respond similarly to any dance

16 regardless of its information content. Yet variation in receiver responses can qualitatively alter

17 collective outcomes. Here, we use network-based diffusion analysis to compare the collective

18 influence of dance information during recruitment to feeders at different distances. We further

19 assess how any such effects might be achieved at the individual level by dance-followers either

20 persisting with known sites when novel targets are distant and/or seeking more accurate spatial

21 information to guide long-distance searches. Contrary to predictions, we found no evidence

22 that dance-followers' responses depended on target distance. While dance information was

23 always key to feeder discovery, its importance did not vary with feeder distance, and bees were  
24 in fact quicker to abandon previously rewarding sites for distant alternatives. These findings  
25 provide empirical support for the longstanding assumption that self-organized foraging by  
26 honeybee colonies relies heavily on signal performance rules with limited input from recipients.

27 *Keywords:* collective behaviour; honeybee; network-based diffusion analysis; social  
28 information; social insects; waggle dances

29

## 30 **Introduction**

31 Living in groups provides opportunities to pool information across multiple individuals in order  
32 to make accurate collective decisions (e.g. navigation in homing pigeons [1]; predator  
33 avoidance in fish [2]). In the social insects, such decisions are the product of many (often  
34 thousands of) individual-level environmental assessments that are shared with nestmates  
35 through evolved communication signals. Simple rules that govern the production or longevity of  
36 these signals can generate non-linear feedbacks that produce accurate collective decisions [3-  
37 5]. A classic example involves waggle dance-based recruitment to foraging locations in the  
38 western honeybee (*Apis mellifera*), whereby energetically efficient trips elicit more waggle runs  
39 on return to the hive [6,7]. Closer sites should hence be over-represented on the dancefloor,  
40 and thus attract more recruits, relative to distant alternatives that offer resources of similar  
41 quality. This straightforward performance rule could thus enable colonies to collectively  
42 optimize energetic efficiency without requiring that dance-followers use the spatial information  
43 contained in the dance to make any decision about the potential value of the trip that lies  
44 ahead of them [3].

45           In the above scenario, dance-followers are expected to respond similarly to any dance,  
46 regardless of its content. Yet research over the past decade has revealed the sophisticated ways  
47 in which insects acquire, process, store, retrieve, and use information [8], raising the possibility  
48 that signal recipients decide how to respond by weighing the costs and benefits of using that  
49 information. For example, ants generally ignore trail pheromones in favour of memories, but  
50 will switch to trail-following if information indicates that doing so will lead to a higher quality  
51 food source [9]. Likewise, experienced honeybee foragers often discount the spatial  
52 information contained in dances in favour of returning to known foraging locations [10-12] and  
53 may devalue dance information when it repeatedly proves unreliable [13]. Accounting for such  
54 individual variation in receiver responses can lead to qualitatively different outcomes in models  
55 of collective behaviour [3,14,15].

56           Here, we use network-based diffusion analysis (NBDA; [16,17]) to evaluate the  
57 responses of dance-followers to dances that indicate novel close or distant feeders. NBDA can  
58 provide an estimate ( $s$ ) of the influence of each dance circuit followed on a dance-follower, and  
59 we propose that this influence may decrease with distance to the target when dance-followers  
60 are unfamiliar with the target resource. This is because locating new sites can require multiple  
61 search trips and hence significant time costs that potentially increase with distance [6,18]. We  
62 created pools of unemployed yet motivated foragers and allowed their recruitment to either  
63 close or distant feeders, estimating the strength of social transmission through the resulting  
64 dance networks. We further monitored behaviour at the individual level to establish the  
65 mechanisms by which such collective effects might be achieved, predicting that (i) bees that  
66 follow dances for distant target recruitment sites may persist with known sites for longer,

67 rather than attempting to locate the new food source, and that (ii) the same bees may invest in  
68 gaining more accurate location information by following more waggle runs pre-departure  
69 [19,20]. Finally, we monitored individual dancer behaviour to confirm our expectation, based  
70 on previous work [6,7], that closer resources will be over-represented on the dancefloor.

71

## 72 **Methods**

### 73 *Colony housing*

74 These experiments were carried out on the campus of Royal Holloway, University of London  
75 from July – September 2018. Three queen-right honeybee colonies were housed indoors within  
76 three-frame observation hives with unrestricted access via tunnels to the outdoors. Colonies  
77 contained 2000 – 3000 workers, brood, and reserves of pollen and honey. Each colony  
78 underwent both a short-distance and a long-distance recruitment trial, performed  
79 consecutively to minimise differences in colony and environmental conditions across trials  
80 (Table S1).

81

### 82 *Training*

83 Working with a single colony at a time, two groups of foragers (13 – 31 per group) were  
84 simultaneously trained using standard techniques (described in [21,22]) to two feeders  
85 providing unscented sucrose solution. In each case, one feeder was designated the *recruit*  
86 *feeder* (always 100m from the hive) and the other the *target feeder* (either 100m or 500m from  
87 the hive) with an angular separation of  $\sim 110^\circ$  between the two feeders (figure 1). During  
88 training, foragers were assigned unique enamel paint marks upon first arriving at a feeder,

89 meaning we could be confident that individuals trained to the recruit feeder had never visited  
90 the target feeder. Later, during the test period (see below), the recruit feeder would become  
91 depleted, creating a pool of marked potential recruits for the target feeder (figure 1).

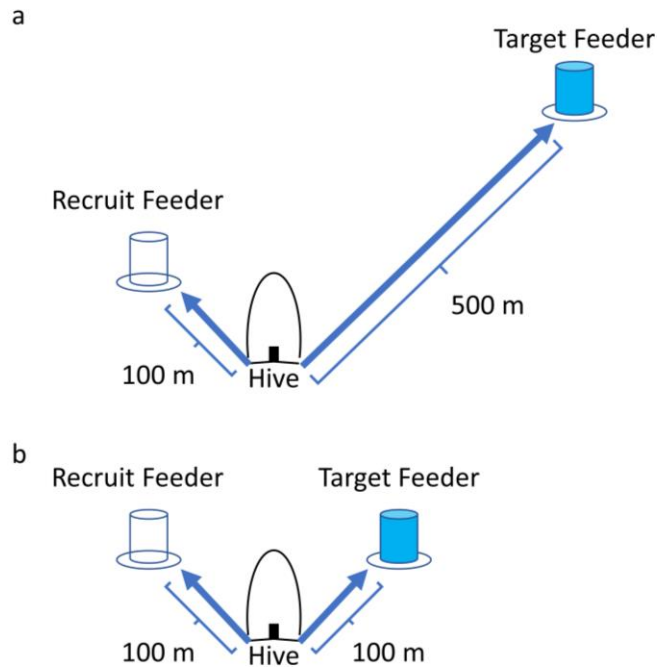

92  
93 **Figure 1.** Feeder arrangement used during (a) long-distance and (b) short-distance trials. Within  
94 each trial, cohorts were simultaneously trained to the recruit and target feeders. During trials,  
95 the recruit feeder was left empty to create a pool of potential recruits for the target feeder.

96  
97 Training took place over 5 – 11 days per trial. Both feeders offered identically scented  
98 sucrose on the final day of training for one hour (following [22]: 50  $\mu$ L essential oil per L  
99 sucrose, plus reservoir of essential oil below the feeder; scents varied between trials; table S1)  
100 in order to promote greater interest in the target feeder during the trial [see 11]. Only  
101 individuals that visited the recruit feeder during either this odour presentation or during the  
102 previous training day were used as potential recruits during the trials. Although most potential

103 recruits visited the recruit feeder multiple times during both of these training days, a small  
104 number of individuals only visited the feeder once during the odour presentation or were only  
105 observed during one 30 min census on the previous day. However, as excluding these 21  
106 individuals did not qualitatively alter our findings or conclusions, we retained them in the full  
107 analysis.

108

### 109 *Trials*

110 Trials commenced between 0930 – 1000 on the following morning. During a trial, the target  
111 feeder continued to provide scented 2M sucrose, whereas the recruit feeder was left empty  
112 (figure 1), thus mimicking a common natural scenario in which one tree or patch of flowers  
113 comes into bloom at the same as another of the same species ceases to be rewarding. We  
114 allowed 10 – 12 foragers previously trained to the target feeder to collect from it, while any  
115 remaining members of this cohort were captured upon arrival. Successful recruits from the  
116 recruit feeder were also allowed to collect freely from the target feeder. We did not restrict the  
117 activities of other bees in the hive, but any that located the target feeder were captured on  
118 arrival. Using both video recordings and in-person observations, we recorded arrival and  
119 departure times for each marked individual at both the recruit and target feeders throughout  
120 the trial. Trials lasted either 120 min (colony A) or 180 min (colonies B and C); this change was  
121 implemented to allow recruits in the 500 m trials additional time to locate the target feeder .

122 During trials, we filmed the dance floor within the observation hive. A wooden baffle  
123 directed foragers onto one side of the hive, meaning the vast majority of dances were visible.

124 For each hive visit made by target feeder foragers (including recruits), we recorded its duration,

125 whether dancing occurred, and the number of waggle runs produced. We also recorded all  
126 dance-following interactions between marked individuals, noting participant identities, when  
127 each interaction occurred, its duration (sec), and the number of waggle runs followed. A bee  
128 was defined as following a waggle run if its head was oriented towards the dancer within 1  
129 antennal length [12]. We further recorded the occurrence of waggle dances by other bees in  
130 the hive for natural food sources, whether these dancers carried pollen, the number of waggle  
131 runs produced, and any instances in which a marked individual followed one of these dances.

132

### 133 *Network-based diffusion analysis (NBDA)*

134 All analyses were carried out in R ver. 4.0.3 [23]. In an NBDA, the strength of social transmission  
135 per unit of network connection (e.g. per waggle run followed), relative to individual  
136 exploration, is estimated by the social transmission parameter,  $s$  [16,17]. Here, we set out to  
137 compare estimates of  $s$  between the close and distant feeders, based on social networks  
138 constructed from our video records of dance-following interactions. Specifically, we used order-  
139 of-acquisition diffusion analysis, in which networks are used to predict the order in which  
140 individuals acquire a behaviour—here, discovery of the target feeder within each trial [17].  
141 Network connections were directed from dancers to followers, and we included models where  
142 connections were weighted either by the number of waggle runs followed or the total duration  
143 (sec) of dance-following in our candidate model sets (described below). To capture the  
144 temporal ordering of dance-following interactions, we used dynamic networks that updated  
145 when individuals departed the hive for the target feeder [24].

146 To compare the relative influence of dance-based transmission for recruitment across  
147 our distance treatments, we fit models in which  $s$  was either estimated separately for short-  
148 and long-distance trials ( $s_{Short} \neq s_{Long}$ ) or in which  $s$  was constrained to be equal across these  
149 treatments ( $s_{Short} = s_{Long}$ ). See the Supplementary Material for more details on specification  
150 of the NBDA models and for the complete candidate model set. Due to asymmetry in the  
151 uncertainty for parameter estimates, profile likelihood techniques were used to obtain 95% CIs  
152 [25]. The NBDA was carried out using the *NBDA* package [26].

153

#### 154 *Individual-level analyses*

155 Prior to seeking out a new feeder, honeybee foragers typically return to known sites (often  
156 extremely persistently), even if they know those sites to be unrewarding [27]. To examine  
157 potential differences in this persistence, and in pre-departure information gathering, when the  
158 alternative target feeder is either close or distant, we classified trips where individuals were  
159 observed at the recruit feeder as “reactivation” trips. If instead that recruit left the hive for  
160 more than 90 seconds and successfully discovered the target feeder or was not observed at  
161 either site, it was classified as searching for the target feeder (‘search trip’).

162 A full description of the individual-level analyses, including all fixed and random effects  
163 in each global model, is provided in tables S2 and S3 and summarised here. Our primary  
164 analyses focussed on the effects of target distance on follower behaviour in terms of: (i) the  
165 number of waggle runs followed before departing the hive (zero-inflated negative binomial  
166 GLMM); and (ii) the probability of searching for the target feeder vs reactivating during these  
167 absences (binomial GLMM). To confirm that longer target distances incur greater search costs,



168 we also analysed (iii) the duration of hive absences (linear mixed-effects model); and (iv) the  
169 number of unsuccessful searches prior to locating the target feeder (Poisson GLMM).

170 For completeness, we also analysed dancer behaviour across the short- and long-  
171 distance treatments, to compare how the two target feeders were represented on the  
172 dancefloor. We included (i) hive visit frequency (linear mixed-effects model); (ii) mean hive visit  
173 duration (linear mixed-effects model); (iii) the probability of dancing per visit (binomial GLMM);  
174 and (iv) the mean number of waggle runs produced during visits with dancing (linear mixed-  
175 effects model).

176 In every model, *Trial* and *colony* were included as a random intercept term and fixed  
177 effect respectively; *individual* was included as a random effect for analyses that included  
178 multiple observations per individual. All input variables were mean-centred and continuous  
179 variables were scaled by dividing by twice their standard deviation [28,29]. LMMs were fitted  
180 using nlme [30] to model heteroscedasticity in the residuals [31] and GLMMs were fitted with  
181 glmmTMB [32]. Inspection of GLMM residuals was carried out using DHARMA [33].

182 We performed model selection on all candidate models nested within each global model  
183 (tables S2 and S3) on the basis of AICc. Models were removed from the candidate set if they  
184 were more complex versions of a model with a lower AICc value [29,34,35]. From this reduced  
185 model set, we extracted a 95% confidence set of models and used these to obtain model-  
186 averaged parameter estimates (MAEs), unconditional standard errors (USEs), and unconditional  
187 95% confidence intervals (CIs) [34]. Where a single model received especially strong support  
188 ( $w_i \geq 0.95$ ), inferences were based on this model alone. Multimodel inference was performed  
189 using the MuMIn package [36].

190

## 191 **Results**

### 192 *Network-based diffusion analysis (NBDA)*

193 In the short- and long-distance trials respectively, 49 and 25 recruits successfully located the  
194 target feeder (table 1). Dance information was key in guiding to foragers to the target feeder,  
195 regardless of its distance from the hive. Of our candidate set for the NBDA, two models  
196 received nearly all support (model probabilities:  $w_1 = 0.91$ ;  $w_2 = 0.09$ ). Both included the  
197 dance-following network and constrained social transmission rates to be equal across distance  
198 treatments (i.e.  $s_{100\ m} = s_{500\ m}$ ), indicating that the acceleratory effects of dance-based  
199 transmission over how rapidly individuals discovered the target feeder did not vary with  
200 foraging distance. The two models differed only in how network connections were weighted:  
201 the top-ranked model weighted connections according to the number of waggle runs followed,  
202 whereas the second-ranked model used the total duration of dance-following interactions. The  
203 best-supported model estimated a social transmission rate of  $2.42 \times 10^7$  (95% CI: 0.90,  $+\infty$ ),  
204 corresponding to an estimated 97 – 100% of recruitment events explained by dance-following.  
205 Estimates from the second-ranked model yielded essentially identical results. In summary, the  
206 NBDA indicated that successful recruitment was predicted by an individual's investment in  
207 dance-following but provided no evidence that the influence of dance information differed  
208 according to the indicated distance. See table S4 for parameter estimates from both models.

209

210

211

212

213 **Table 1.** Summary of experimental trials (TF: target feeder; RF: recruit feeder). Data provided as  
214 sample size or mean  $\pm$  SD. Hive absences were labelled as 'reactivation' if a forager returned to  
215 the RF; otherwise, foragers were assumed to be searching for the TF.

| Colony | TF distance | RF trained | TF recruits | Dancers: Waggle runs per hive visit | Followers: TF waggle runs followed per hive visit |                 |
|--------|-------------|------------|-------------|-------------------------------------|---------------------------------------------------|-----------------|
|        |             |            |             |                                     | Reactivation                                      | Searching       |
| A      | 100 m       | 21         | 16          | 11.4 $\pm$ 18.5                     | 3.9 $\pm$ 4.2                                     | 7.4 $\pm$ 5.3   |
| A      | 500 m       | 26         | 3           | 11.8 $\pm$ 15.3                     | 2.3 $\pm$ 3.5                                     | 8.3 $\pm$ 6.4   |
| B      | 100 m       | 31         | 22          | 15.5 $\pm$ 15.5                     | 5.2 $\pm$ 6.9                                     | 14.4 $\pm$ 7.9  |
| B      | 500 m       | 22         | 9           | 12.5 $\pm$ 13.6                     | 3.6 $\pm$ 4.6                                     | 17.4 $\pm$ 10.2 |
| C      | 100 m       | 28         | 11          | 4.6 $\pm$ 8.1                       | 2.3 $\pm$ 3.3                                     | 4.7 $\pm$ 4.8   |
| C      | 500 m       | 30         | 13          | 11.3 $\pm$ 13.6                     | 4.1 $\pm$ 7.1                                     | 13.6 $\pm$ 8.5  |

216

### 217 *Follower behaviour*

218 As expected, individuals typically made multiple trips to the empty recruit feeder before  
219 searching for the new target (see also [11]), and the probability of abandoning the recruit  
220 feeder in favour of searching for the target feeder increased over time (binomial GLMM: hive  
221 visit: MAE  $\pm$  USE = 2.7  $\pm$  0.23 (95% CI: 2.25, 3.15); figure 2). However, contrary to our  
222 expectations, bees were quicker to engage in search trips when the target feeder was distantly  
223 located than when it was close to the hive (binomial GLMM: target feeder distance (500 m):  
224 MAE  $\pm$  USE = 0.9  $\pm$  0.22 (95% CI: 0.48, 1.32); target feeder distance \* hive visit: MAE  $\pm$  USE =  
225 1.91  $\pm$  0.46 (95% CI: 1.01, 2.81); figure 2). See tables S5 and S6 for full model summaries.

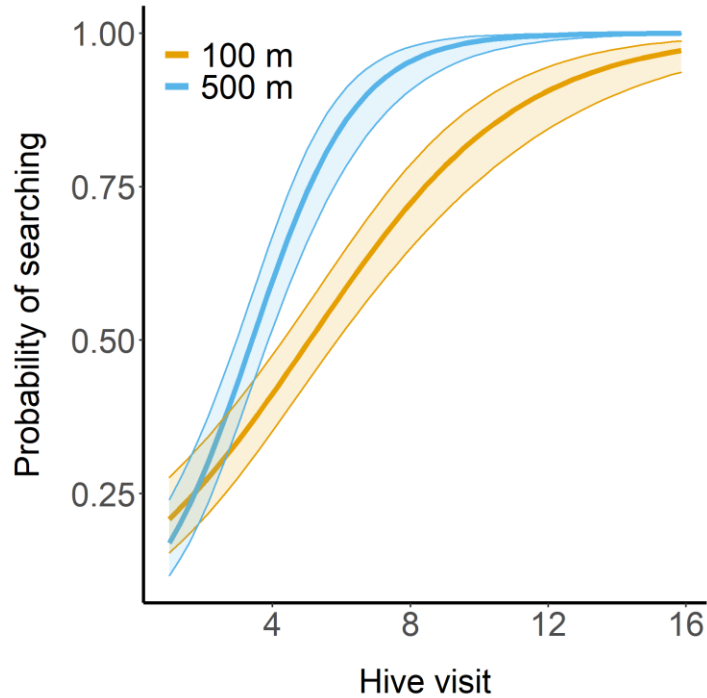

226

227 **Figure 2.** Predicted probability of searching for the target feeder upon departing the hive. Lines  
228 and shaded regions respectively indicate predicted values and 95% CI calculated from model-  
229 averaged GLMM fixed effects with all random effects set to 0.

230 In line with previous work [11,37], we found that foragers on average followed more  
231 waggle runs before departing in search of the target feeder than when re-visiting the empty  
232 feeder, though this effect lessened over time (zero-inflated negative binomial GLMM: search  
233 trip: MAE  $\pm$  USE = 0.75  $\pm$  0.06 (95% CI: 0.63, 0.87); searching \* hive visit: MAE  $\pm$  USE = -0.53  $\pm$   
234 0.13 (95% CI: -0.78, -0.27)). However, there was no evidence at the 95% confidence level that  
235 bees followed more waggle runs before searching when the feeder was more distantly located  
236 (same GLMM: TF distance (500 m) \* search trip: MAE  $\pm$  USE = 0.17  $\pm$  0.15 (95% CI: -0.11, 0.47);  
237 figure 3). See tables S7 and S8 for full model summaries.

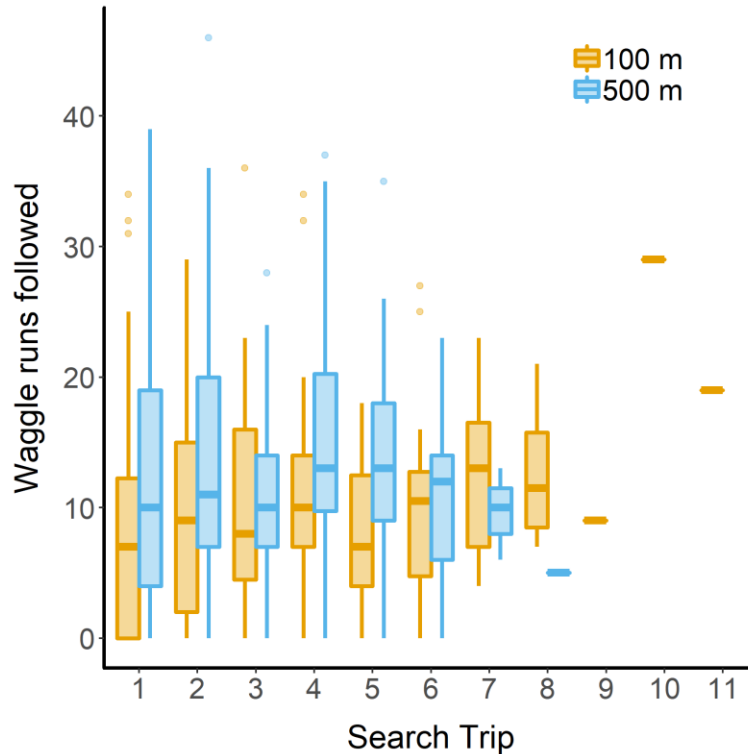

238

239 **Figure 3.** The number of waggle runs followed prior to searching for the target feeder. Thick  
240 lines indicate medians, boxes enclose the interquartile range, and whiskers extend to up to 1.5x  
241 this range.

242 As expected if long-distance searches are more costly, search trips into the field were  
243 longer in duration than reactivation trips only when the target feeder was more distant (LMM:  
244 target feeder distance (500 m) \* search trip: MAE  $\pm$  USE = 0.6  $\pm$  0.06 (95% CI: 0.48, 0.72); figure  
245 4a; tables S9 & S10). Comparing the mean duration of searches for the target feeder vs.  
246 collection trips made by employed foragers (minus time spent at the feeder) confirmed that  
247 both search and collection trips took more time when the target feeder was more distant from  
248 the hive (LMM: target distance (500 m): estimate  $\pm$  SE = 0.63  $\pm$  0.03 (95% CI: 0.5, 0.76); table  
249 S11) and that search trips were longer in duration than collection trips (LMM: trip type  
250 (collection): estimate  $\pm$  SE = -0.6  $\pm$  0.05 (95% CI: -0.69, -0.51); table S11). However, searches

251 were not disproportionately longer at 500 m than at 100 m (the best-supported model,  $w_i >$   
252 0.99, did not include an interaction between target feeder distance and trip type; table S11).  
253 Regardless of distance, successful recruits undertook a similar number of unsuccessful searches  
254 before eventually locating the target feeder (Poisson GLMM: target feeder distance (500 m):  
255 MAE  $\pm$  USE =  $-0.24 \pm 0.22$  (95% CI:  $-0.67, 0.18$ ); figure 4b; tables S12 & S13).

256 In addition to dances for the target feeder, we observed 122 dances for natural food  
257 sources. These dancers produced  $8.74 \pm 12.37$  (mean  $\pm$  SD) waggle runs per dance and carried  
258 pollen in 56 of these dances. Although our focal bees occasionally followed these natural  
259 dances, these following events were brief in duration (mean  $\pm$  SD =  $1.13 \pm 0.35$  waggle runs  
260 followed;  $n = 40$  dance-following events). Out of 519 prospective search flights, only 10 (i.e.  
261 1.9%) involved a focal bee following a dance for a natural food source (mean  $\pm$  SD =  $1.8 \pm 1.03$   
262 waggle runs followed).

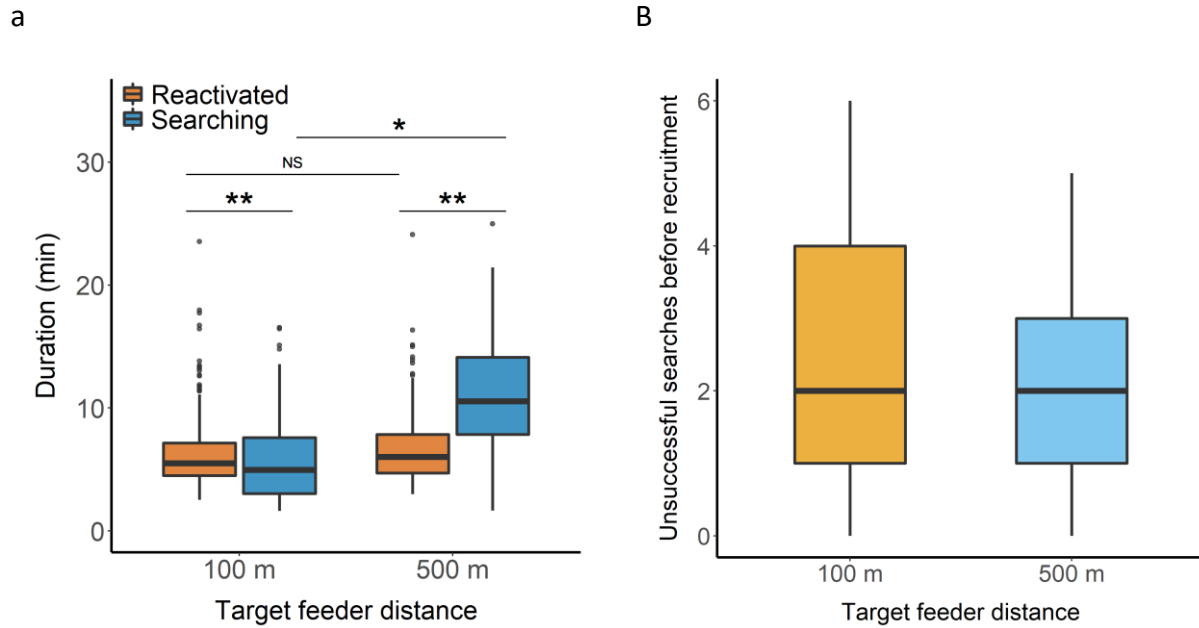

263 **Figure 4.** (a) Duration of hive absences and (b) number of unsuccessful searches before  
264 discovering the target feeder. Absences were labelled as reactivations if foragers returned to  
265 the empty recruit feeder and searches for the target feeder otherwise. The y-axis in (a) has  
266 been truncated to enhance clarity; an additional reactivation was observed in both the short-  
267 and long-distance trials with respective durations of 64.9 and 35.7 min. Thick lines indicate  
268 medians, boxes enclose the interquartile range, and whiskers extend up to 1.5x this range. *P*  
269 values for contrasts were adjusted using the Bonferroni method: \*:  $P < 0.01$ ; \*\*:  $P < 0.001$ .

270

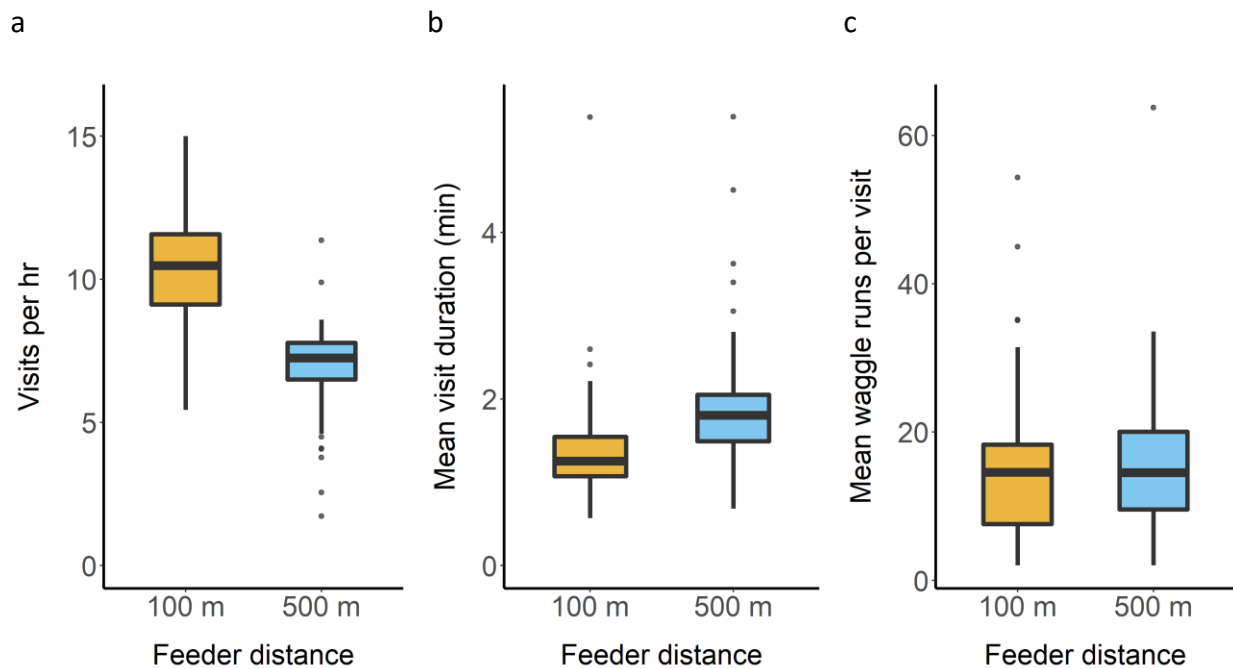

271 **Figure 5.** (a) Hive visit frequency, (b) mean visit duration, and (c) mean waggle runs produced  
272 per visit with dancing by foragers collecting from the target feeder. Thick lines indicate  
273 medians, boxes enclose the interquartile range, and whiskers extend up to 1.5x this range.

274

#### 275 *Dancer behaviour*

276 In line with previous work [7,21], dances representing the more distant (and thus less  
277 energetically efficient) 500 m feeder were underrepresented on the dancefloor relative to  
278 those for the closer feeder. This occurred because dancers visited the hive less frequently when  
279 the target feeder was more distantly located (LMM: target feeder distance (500 m): estimate  $\pm$   
280 SE =  $-3.58 \pm 0.37$  (95% CI:  $-5.15, -2.01$ ); table S14). On average, dancers made  $10.3 \text{ visits hr}^{-1}$   
281 when the feeder was located 100 m from the hive, but only  $6.9 \text{ visits hr}^{-1}$  when it was 500 m  
282 away (figure 5a). This is in part because travel to and from the distant feeder took longer (table



283 S11), but foragers collecting at 500 m also tended to remain in the hive for longer on each visit  
284 (LMM: target feeder distance (500 m): estimate  $\pm$  SE =  $0.51 \pm 0.09$  (95% CI: 0.12, 0.89); figure  
285 5b; table S15). In contrast to our expectation that bees foraging at the distant feeder would be  
286 less likely to dance upon returning to the hive, there was no evidence that foraging distance  
287 influenced foragers' propensity to dance (table S16). If anything, foragers in long-distance trials  
288 tended to be more likely to dance during hive visits (binomial GLMM: target feeder distance  
289 (500 m): estimate  $\pm$  SE =  $0.72 \pm 0.71$  (95% CI: -0.67, 2.11)), though the best-supported model ( $w_i$   
290  $> 0.99$ ) did not include this effect (table S16). There was also no evidence that dancers for more  
291 distant feeders produced fewer waggle runs (LMM: target feeder distance (500 m): MAE  $\pm$  USE  
292 =  $0.31 \pm 1.79$  (95% CI: -3.2, 3.82); tables S17 & S18; figure 5c).

293

## 294 **Discussion**

295 The traditional view of insects as mere stimulus-response "machines" has given way to a  
296 growing recognition that despite their miniature brains, insects possess sophisticated cognitive  
297 capabilities [8]. Thus, although empirically derived theoretical models have shown how simple  
298 rules that govern the production of waggle dances are sufficient to generate adaptive collective  
299 responses by honeybee colonies without requiring that dance-followers evaluate the  
300 transmitted spatial information [3,22], dance-followers may in principle be able to fine-tune  
301 their responses according to this information. Here, we used NBDA to first ask whether bees  
302 respond differently to dances depending on the indicated foraging distance. In contrast to our  
303 predictions, we found no difference in the estimated influence of dance communication ( $s$ ) on  
304 the order in which recruits arrived at our close or distant novel feeders. We further found that

305 increased foraging distance was not associated with increased investment in dance-following  
306 prior to searching, and that foragers were in fact quicker to abandon a depleted site when the  
307 alternative was more distantly located. Taken together, these findings suggest that dance-  
308 followers do not evaluate the distance information contained in a dance when deciding how to  
309 respond to it.

310         As foraging distances increase, searches require progressively greater investments in  
311 time and energy, exacerbated by the fact that dance-guided searches often fail (figure 4b;  
312 [6,18]). Why then are bees not more reticent to accept recruitment to distant novel sources?  
313 Dances are followed both by bees that have never visited the target site (recruitment) and bees  
314 that know its location (reactivation), with only the former incurring search costs. Since dancers  
315 do not know for which purpose their audience is following, we expected the behavioural rules  
316 that translate the energetic efficiency of a foraging trip into the number of waggle runs  
317 performed to ignore these additional search costs, allowing instead for dance-followers to fine-  
318 tune their responses depending on their informational status. However, it may be that the  
319 increasing search costs elicited by distant resources are already sufficiently accounted for  
320 through their under-representation on the dancefloor and that additional receiver responses  
321 are not needed to achieve adaptive collective foraging, especially given that we found that  
322 although search costs do increase with distance, they are not disproportionately large at  
323 greater distances.

324         Alternatively, it may be the case that while sensitivity to distance information by  
325 followers could increase colony foraging efficiency, the mechanisms by which it could be  
326 achieved have diminishing returns. For example, beyond a certain point, the extra time spent

327 following additional dance circuits may not appreciably increase the likelihood of locating a site.  
328 Moreover, the positive relationship between foraging site distance and waggle run duration  
329 means that as foraging distances increase, foragers must invest ever more time in dance-  
330 following to acquire similar amounts of information [21,38]. The use of dance information may  
331 involve a speed-accuracy trade-off [39], such that setting out with reasonably accurate spatial  
332 information may often be preferable to investing further time in waiting for and following  
333 dances.

334         Although honeybees have been known to forage from sites that are located upwards of  
335 10 km from the hive [22,40], dance decoding studies have shown that the median distance  
336 travelled under natural conditions is often an order of magnitude lower than this [41]. For  
337 example, we recently found the median distance indicated by dances across an entire season in  
338 southern England to be 708m and 1108m for urban and agricultural sites respectively [42].  
339 Nonetheless, it is clear that our feeder locations, at 100 and 500m from the hive, do not  
340 represent the full foraging range. However, we note that previous work has detected  
341 modifications to dance behaviour between sites at 250 and 500m [7], and that our distance  
342 treatments were distinct enough to drive observable differences in search costs. Thus, while we  
343 cannot rule out that dance followers take the indicated distance into account when deciding  
344 whether to seek out a very distant site, we are confident that our treatments should have  
345 elicited an effect if one exists within this range.

346         In agreement with earlier studies [11,12,37], most foragers visited the empty recruit  
347 feeder several times before searching for the target feeder. Yet rather than foragers being  
348 more reluctant to abandon this site when alternatives were more distant (as predicted), the

349 opposite pattern was observed (figure 2). It is possible that this finding simply stems from how  
350 foraging trips were labelled—i.e., during reactivations, it was assumed that bees did not also  
351 search for the target feeder. However, studies using harmonic radar to track bees' foraging  
352 flights have revealed the occurrence of such cross-trips between familiar and unfamiliar  
353 foraging locations [43], potentially allowing individuals to gain up-to-date information on  
354 familiar foraging sites while also making use of dance information without requiring that they  
355 first return to the hive. If joint reactivation-search trips occurred more often in short-distance  
356 trials when feeders were relatively close together [43], this could be reflected in our analysis as  
357 a lower likelihood of searching when the target was nearby. However, although we cannot rule  
358 out that such trips occurred, our data suggest that they were unlikely to be especially common  
359 (see Supplementary Material, tables S19 & S20). Alternately, the dance-indicated location in  
360 long-distance trials may have been easier to identify as a novel site, as neither the distance nor  
361 directional components matched that of the recruit feeder [21,37]. Regardless, our results  
362 complement previous reports that honeybees' persistence to familiar sites depend more on  
363 previous profitability than on the availability of alternatives [27].

364         Although we assumed that during departures from the hive, potential recruits were  
365 either returning to the recruit feeder or searching for the target feeder, individuals may also  
366 have engaged in alternative foraging behaviours, including visiting other known foraging  
367 locations or searching for natural food sources. However, trials took place during the late  
368 summer and early autumn when few natural food sources are available to bees in southern  
369 England [41]. Accordingly, foragers were highly persistent in visiting the feeders during training,  
370 limiting their opportunities to learn about other foraging sites prior to the trial. In addition,

371 there were relatively few dances for natural sources during the trials and these were rarely  
372 followed by our focal individuals. When natural dances were followed, these bouts were always  
373 brief in duration, indicating that foragers were not attempting to decode the dance's spatial  
374 information [44]. Individuals may also have attempted to locate other foraging sites through  
375 individual scouting. However, previous reports have found that scouting is relatively rare when  
376 dances are readily available in the hive [18,45], as was the case in our study. We therefore feel  
377 confident that most searching events represented attempts to locate the target feeder.  
378 Nevertheless, we repeated our analysis of: (i) the duration of searching events and (ii) the  
379 number of waggle runs followed prior to each search using only the subset of successful  
380 recruitment events. Our findings were consistent with our more inclusive analysis: in long-  
381 distance trials, searches were longer in duration and recruits followed more waggle runs prior  
382 to a successful search, but this latter difference was not significant at the 95% level (tables S21  
383 & S22).

384         Given that the colony represents the reproductive unit in honeybees, natural selection is  
385 expected to have acted on the heuristics that guide behaviour at the individual level in order to  
386 produce adaptive colony-level responses [3]. Although such individual-level algorithms could in  
387 principal lead recruits to differentially respond to dances according to the indicated distance,  
388 we found no evidence that this is the case. Rather, our results provide empirical support to the  
389 long-standing assumption that the effective allocation of recruits among foraging sites does not  
390 depend on information processing by dance-followers, but on the rules that govern the  
391 production of dances themselves, the tempo of foraging, and whether or not to abandon a  
392 foraging patch [22]. However, due to the challenges involved in studying decision-making in

393 bees foraging on natural sources, most studies (including our own) have used artificial food  
394 sources located relatively near to the hive that offer an unrestricted flow of sucrose. Additional  
395 investigations into how the production of dances is modulated under more naturalistic foraging  
396 conditions and how dance-followers respond to this information would be worthwhile.

397 **Data accessibility.** Raw data and code to reproduce all analyses are available from the Dryad  
398 Digital Repository: <https://doi.org/10.5061/dryad.8kpr4xn8> [46].

399 **Authors' contributions.** M.J.H. and E.L. designed the study. M.J.H. collected the data and M.J.H.  
400 and W.H. analysed it. M.J.H. wrote the initial draft and all authors contributed to revisions.

401 **Acknowledgements.** We thank Alex Hadleigh for assistance with carrying out the experiments  
402 described here.

403 **Competing interests.** We declare we have no competing interests.

404 **Funding.** This research was funded by the European Research Council under the European  
405 Union's Horizon 2020 research and innovation programme (grant number 638873).

## 406 **References**

- 407 1. Dell'Arciccia, G., Dell'Omo, G., Wolfer, D. P., & Lipp, H.-P. (2008). Flock flying improves  
408 pigeons' homing: GPS track analysis of individual flyers versus small groups. *Animal*  
409 *Behaviour*, *76*, 1165-1172.  
410
- 411 2. Ward, A. J. W., Herbert-Read, J. E., Sumpter, D. J. T., & Krause, J. (2011). Fast and accurate  
412 decisions through collective vigilance in fish shoals. *Proceedings of the National Academy of*  
413 *Sciences of the U. S. A.*, *108*, 2312-2315.  
414
- 415 3. Detrain, C., & Deneubourg, J.-L. (2008). Collective decision-making and foraging patterns in  
416 ants and honeybees. *Advances in Insect Physiology*, *35*, 123-173.  
417
- 418 4. Seeley, T. D. (2010). *Honeybee democracy*. Princeton, NJ: Princeton University Press.  
419

- 420 5. Sasaki, T., Granovskiy, B., Mann, R. P., Sumpter, D. J. T., & Pratt, S. C. (2013). Ant colonies  
421 outperform individuals when a sensory discrimination task is difficult but not when it is  
422 easy. *Proceedings of the National Academy of Sciences of the U. S. A.*, *110*, 13769-13773.  
423
- 424 6. Seeley, T. D., & Towne, W. F. (1992). Tactics of dance choice in honey bees: do foragers  
425 compare dances? *Behavioral Ecology and Sociobiology*, *30*, 59-69.  
426
- 427 7. Seeley, T. D. (1994). Honey bee foragers as sensory units of their colonies. *Behavioral*  
428 *Ecology and Sociobiology*, *34*, 51-62.  
429
- 430 8. Giurfa, M. (2015). Learning and cognition in insects. *Wiley Interdisciplinary Reviews:*  
431 *Cognitive Science*, *6*, 383-395.  
432
- 433 9. Czaczkes, T. J., Beckwith, J. J., Horsch, A.-L., & Hartig, F. (2019). The multi-dimensional  
434 nature of information drives prioritization of private over social information in ants.  
435 *Proceedings of the Royal Society B*, *286*, 20191136.  
436
- 437 10. Grüter, C., Balbuena, M. S., & Farina, W. M. (2008). Informational conflicts created by the  
438 waggle dance. *Proceedings of the Royal Society B*, *275*, 1321-1327.  
439
- 440 11. Grüter, C., & Ratnieks, F. L. W. (2011). Honeybee foragers increase the use of waggle dance  
441 information when private information becomes unrewarding. *Animal Behaviour*, *81*, 949-  
442 954.  
443
- 444 12. Hasenjager, M. J., Hoppitt, W., & Leadbeater, E. (2020). Network-based diffusion analysis  
445 reveals context-specific dominance of dance communication in foraging honeybees. *Nature*  
446 *Communications*, *11*, 625.  
447
- 448 13. l'Anson Price, R., Dulex, N., Vial, N., Vincent, C., & Grüter, C. (2019). Honeybees forage more  
449 successfully without the "dance language" in challenging environments. *Science Advances*,  
450 *5*, eaat0450.  
451
- 452 14. Schürch, R., & Grüter, C. (2014). Dancing bees improve colony foraging success as long-term  
453 benefits outweigh short-term costs. *PLoS ONE*, *9*, e104660.  
454
- 455 15. Lemanski, N. J., Cook, C. N., Smith, B. H., & Pinter-wollman, N. (2019). A multiscale review of  
456 behavioral variation in collective foraging behavior in honey bees. *Insects*, *10*, 370.  
457
- 458 16. Franz, M., & Nunn, C. L. (2009). Network-based diffusion analysis: a new method for  
459 detecting social learning. *Proceedings of the Royal Society B*, *276*, 1829-1836.  
460

- 461 17. Hoppitt, W., Boogert, N. J., & Laland, K. N. (2010). Detecting social transmission in networks.  
462 *Journal of Theoretical Biology*, 263, 544-555.  
463
- 464 18. Biesmeijer, J. C., & Seeley, T. D. (2005). The use of waggle dance information by honey bees  
465 throughout their foraging careers. *Behavioral Ecology and Sociobiology*, 59, 133-142.  
466
- 467 19. Tanner, D., & Visscher, K. (2008). Do honey bees average directions in the waggle dance to  
468 determine a flight direction? *Behavioral Ecology and Sociobiology*, 62, 1891-1898.  
469
- 470 20. Tanner, D., & Visscher, K. (2009). Does the body orientation of waggle dance followers  
471 affect the accuracy of recruitment? *Apidologie*, 40, 55-62.  
472
- 473 21. von Frisch, K. (1967). *The dance language and orientation of bees*. Cambridge, MA: Harvard  
474 University Press.  
475
- 476 22. Seeley, T. D. (1995). *The wisdom of the hive: The social physiology of honey bee colonies*.  
477 Cambridge, MA: Harvard University Press.  
478
- 479 23. R Core Team. (2020). R: a language and environment for statistical computing. R Foundation  
480 for Statistical Computing, Vienna, Austria. <https://www.R-project.org/>  
481
- 482 24. Hasenjager, M. J., Leadbeater, E., & Hoppitt, W. (2021). Detecting and quantifying social  
483 transmission using network-based diffusion analysis. *Journal of Animal Ecology*, 90, 8-26.  
484 doi: 10.1111/1365-2656-13307.  
485
- 486 25. Morgan, B. J. T. (2009). *Applied stochastic modelling* (2<sup>nd</sup> ed.) Boca Raton, FL: Chapman &  
487 Hall/CRC Press.  
488
- 489 26. Hoppitt, W., Photopoulou, T., Hasenjager, M., & Leadbeater, E. (2020). NBDA: a package for  
490 implementing network-based diffusion analysis. R package version 0.9.4.  
491 <https://github.com/whoppitt/NBDA>  
492
- 493 27. Al Toufalia, H., Grüter, C., & Ratnieks, F. L. W. (2013). Persistence to unrewarding feeding  
494 locations by honeybee foragers (*Apis mellifera*): the effects of experience, resource  
495 profitability and season. *Ethology*, 119, 1096-1106.  
496
- 497 28. Schielzeth, H. (2010). Simple means to improve the interpretability of regression  
498 coefficients. *Methods in Ecology and Evolution*, 1, 103-113.  
499



- 500 29. Grueber, C. E., Nakagawa, S., Laws, R. J., & Jamieson, I. G. (2011). Multimodel inference in  
501 ecology and evolution: challenges and solutions. *Journal of Evolutionary Biology*, *24*, 699-  
502 711.
- 503
- 504 30. Pinheiro, J., Bates, D., DebRoy, S., Sarkar, D., & R Core Team. (2018). nlme: linear and  
505 nonlinear mixed effects models. R package version 3.1-137, [https://CRAN.R-](https://CRAN.R-project.org/package=nlme)  
506 [project.org/package=nlme](https://CRAN.R-project.org/package=nlme).
- 507
- 508 31. Zuur, A. F., Ieno, E. N., Walker, N. J., Saveliev, A. A., & Smith, G. M. (2009). Mixed effects  
509 models and extensions in ecology with R. New York, NY: Springer Science+Business Media.
- 510
- 511 32. Brooks, M. E., Kristensen, K., van Benthem, K. J., Magnusson, A., Berg, C. W., Nielsen, A., et  
512 al. (2017). glmmTMB balances speed and flexibility among packages for zero-inflated  
513 generalized linear mixed modeling. *The R Journal*, *9*, 378-400.
- 514
- 515 33. Hartig, F. (2020). DHARMA: residual diagnostics for hierarchical (multi-level/mixed)  
516 regression models. R package version 0.3.1. <https://CRAN.R-project.org/package=DHARMA>.
- 517
- 518 34. Burnham, K. P., & Anderson, D. R. (2002). *Model selection and multimodel inference: A*  
519 *practical information-theoretic approach* (2<sup>nd</sup> Ed.). New York, NY: Springer-Verlag.
- 520
- 521 35. Richards, S. A. (2008). Dealing with overdispersed count data in applied ecology. *Journal of*  
522 *Applied Ecology*, *45*, 218-227.
- 523
- 524 36. Barton, K. (2019). MuMIn: multi-model inference. R package version 1.43.6. [https://CRAN.R-](https://CRAN.R-project.org/package=MuMIn)  
525 [project.org/package=MuMIn](https://CRAN.R-project.org/package=MuMIn).
- 526
- 527 37. Grüter, C., Segers, F. H. I. D., & Ratnieks, F. L. W. (2013). Social learning strategies in  
528 honeybee foragers: do the costs of using private information affect the use of social  
529 information? *Animal Behaviour*, *85*, 1443-1449.
- 530
- 531 38. Al Toufaily, H., Couvillon, M. J., Ratnieks, F. L. W., & Grüter, C. (2013). Honey bee waggle  
532 dance communication: signal meaning and signal noise affect dance follower behaviour.  
533 *Behavioral Ecology and Sociobiology*, *67*, 549-556.
- 534
- 535 39. Chittka, L., Skorupski, P., & Raine, N. E. (2009). Speed-accuracy tradeoffs in animal decision  
536 making. *Trends in Ecology and Evolution*, *24*, 400-407.
- 537
- 538 40. Beekman, M., & Ratnieks, F. L. W. (2000). Long-range foraging by the honey-bee, *Apis*  
539 *mellifera* L. *Functional Ecology*, *14*, 490-496.
- 540

- 541 41. Couvillon, M. J., Schürch, R., & Ratnieks, F. L. W. (2014). Waggle dance distances as  
542 integrative indicators of seasonal foraging challenges. *PLOS ONE*, *9*, e93495.  
543
- 544 42. Samuelson, A. E., Schürch, R., & Leadbeater, E. (2019). Dancing bees evaluate agricultural  
545 forage resources as inferior to central urban land. *bioRxiv*, 2019.12.19.882076.  
546
- 547 43. Menzel, R., Kirbach, A., Haass, W.-D., Fischer, B., Fuchs, J., Koblöfsky, M., et al. (2011). A  
548 common frame of reference for learned and communicated vectors in honeybee navigation.  
549 *Current Biology*, *21*, 645-650.  
550
- 551 44. Grüter, C., & Farina, W. M. (2009). The honeybee waggle dance: can we follow the steps?  
552 *Trends in Ecology and Evolution*, *24*, 242-247.  
553
- 554 45. Beekman, M., Gilchrist, A. L., Duncan, M., & Sumpter, D. J. T. (2007). What makes a  
555 honeybee scout? *Behavioral Ecology and Sociobiology*, *61*, 985-995.  
556
- 557 46. Hasenjager, M. J., Hoppitt, W., & Leadbeater, E. (2021). Data from: Honeybee dance-  
558 followers respond similarly to dances regardless of their spatial information content. Dryad  
559 Digital Repository. <https://doi.org/10.5061/dryad.8kpr4xn8>
